# Supplementary material for: Effects of substituents on the intermolecular interaction, morphology, and charge transport of novel bis-lactam-based molecules
Source: Royal Society of Chemistry journal article supplement (doi:10.1039/d1tc04019g), 2021-01-01
Supplement: d1tc04019g1.pdf [file d1tc04019g1.pdf]

Supporting Information for

# Effects of substituents on intermolecular interaction, morphology, and charge transport of novel bis-lactam-based molecules†

Su-Yeon Kim,<sup>a</sup> Jin Hong Kim,<sup>a</sup> Min-Woo Choi,<sup>a</sup> Ji Eon Kwon,<sup>‡a</sup> and Soo Young Park<sup>\*a</sup>

<sup>a</sup>Center for Supra molecular Optoelectronic Materials, Department of Materials Science and Engineering, Seoul National University, 1 Gwanak-ro, Gwanak-gu, Seoul 08826, Korea

† Electronic Supplementary Information (ESI) available: *Supporting data (Fig. S1-S10 and Tables S1-S8) and NMR Spectra.*

‡ Current address: Functional Composite Materials Research Center, Korea Institute of Science and Technology (KIST), 92 Chudong-ro, Bondong-eup, Wanju-gun, Jeonbuk 55324, Republic of Korea

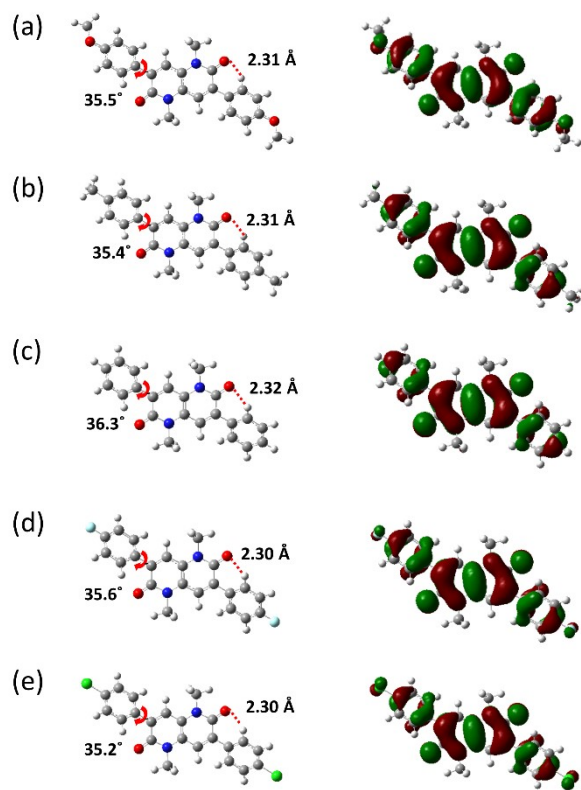

**Fig. S1** The optimized molecular geometries (left) and the corresponding HOMO diagrams (right) of (a) **NTDP-OMe**, (b) **NTDP-Me**, (c) **NTDP**, (d) **NTDP-F**, and (e) **NTDP-Cl**, respectively, calculated by DFT method using B3LYP/6-31G(d,p). The red dotted lines represent the intramolecular distance between C–H...O.

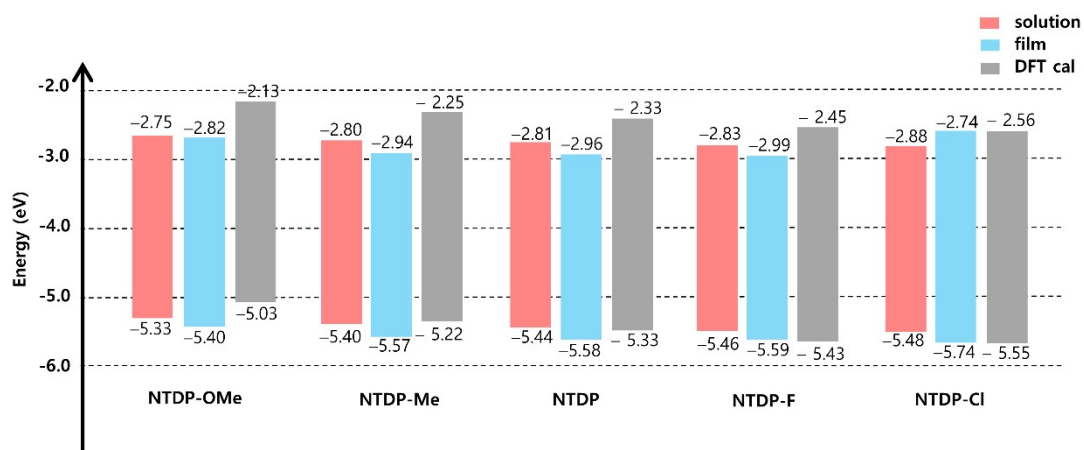

**Fig. S2** The energy levels diagrams determined from cyclic voltammetry of **NTDP-OMe**, **NTDP-Me**, **NTDP**, **NTDP-F**, and **NTDP-Cl** in the solution states (red bar) and in the thin-film states (blue bar), and calculated by the DFT calculation (gray bar).

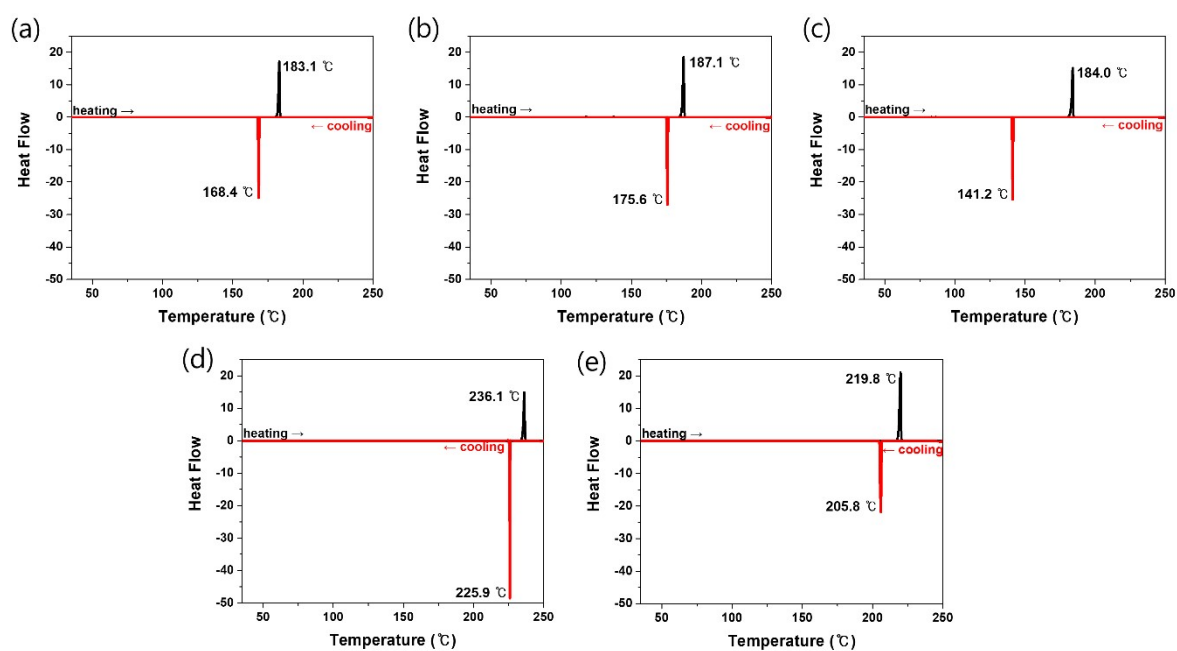

**Fig. S3** The DSC thermograms of (a) NTDP-OMe, (b) NTDP-Me, (c) NTDP, (d) NTDP-F, and (e) NTDP-Cl. The black and red lines demonstrate the heating process and cooling process, respectively.

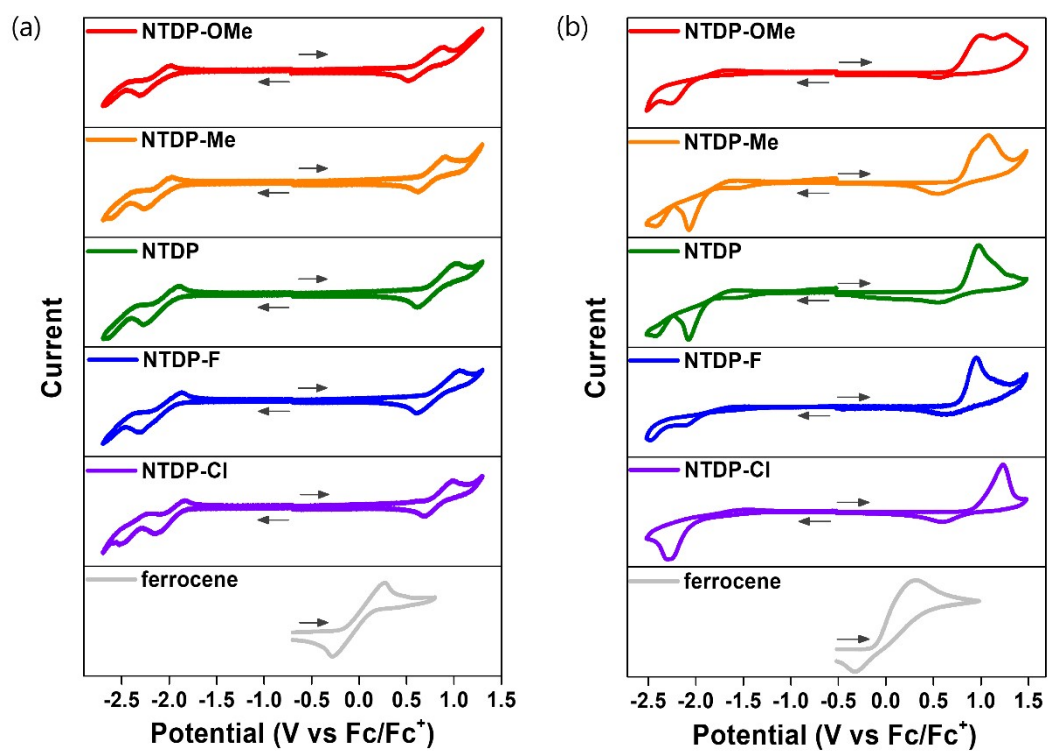

**Fig. S4** The CV curves of the NTDP derivatives (a) in  $\text{CH}_2\text{Cl}_2/\text{TBAHFP}$  (0.1 M), (b) in thin-film states.

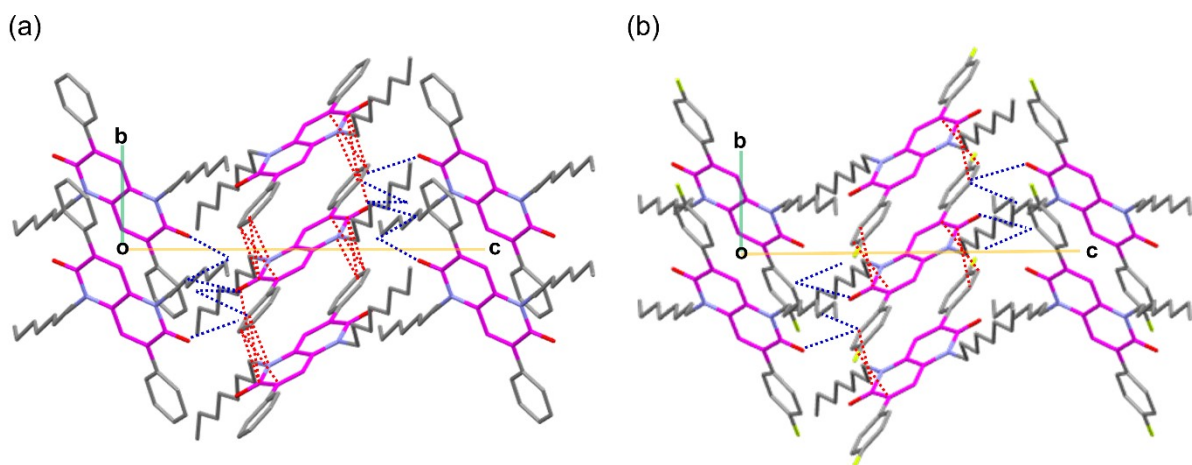

**Fig. S5** The intermolecular short contacts of (a) **NTDP** and (b) **NTDP-F**, respectively. The red and blue dotted lines demonstrated intermolecular short contacts in the [010] and [001] directions, respectively.

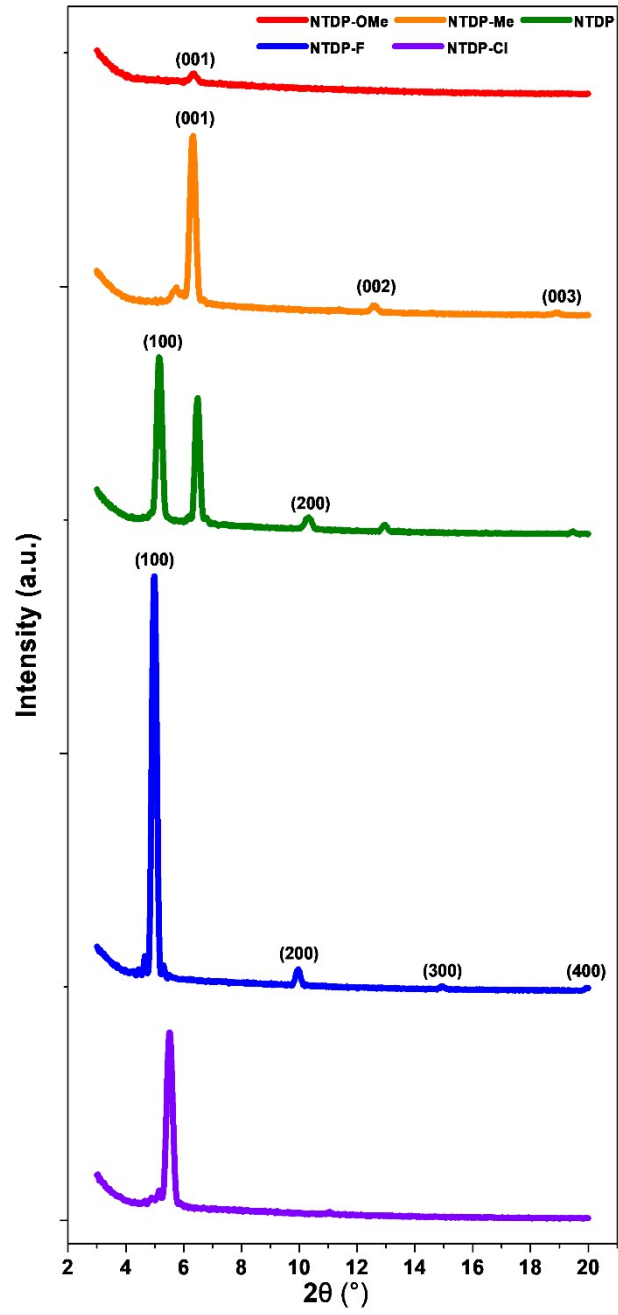

Fig. S6 The out of plane XRD profiles for the vacuum-deposited NTDP thin films.

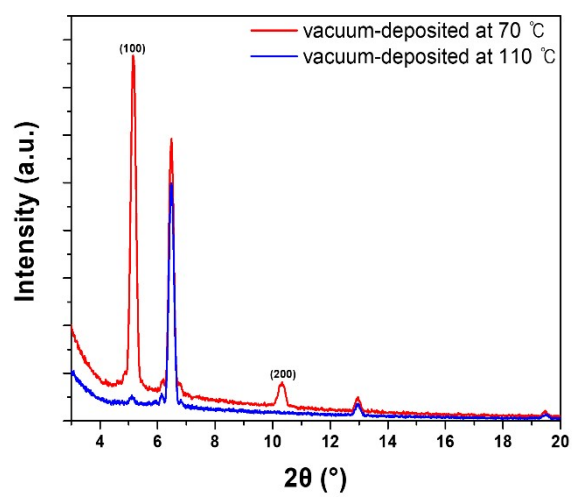

**Fig. S7** The out of plane XRD profile for the NTDP thin-film at 70°C (optimized temperature) and 110 °C.



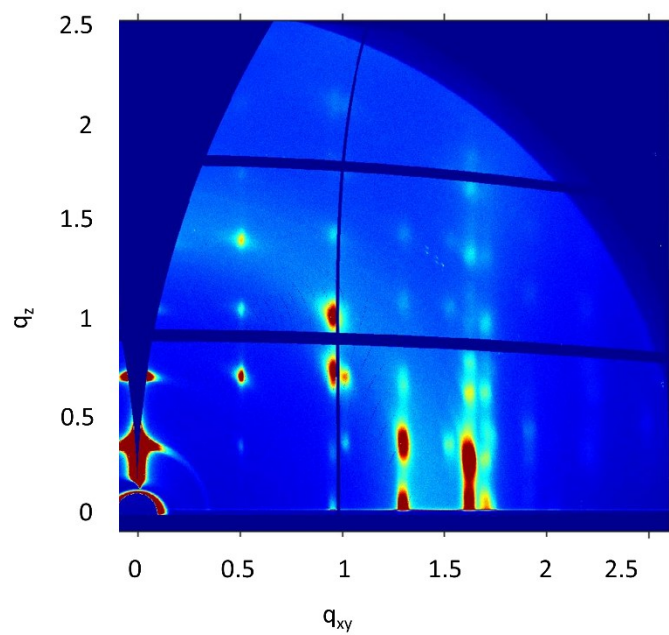

**Fig. S8** The GIXD image of the NTDP-F spin-coated thin-film.

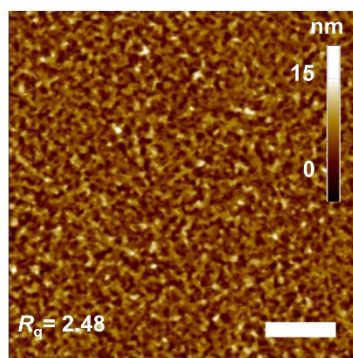

**Fig. S9** The AFM image of the spin-coated **NTDP-F** thin film. (Scale bar 20  $\mu\text{m}$ )

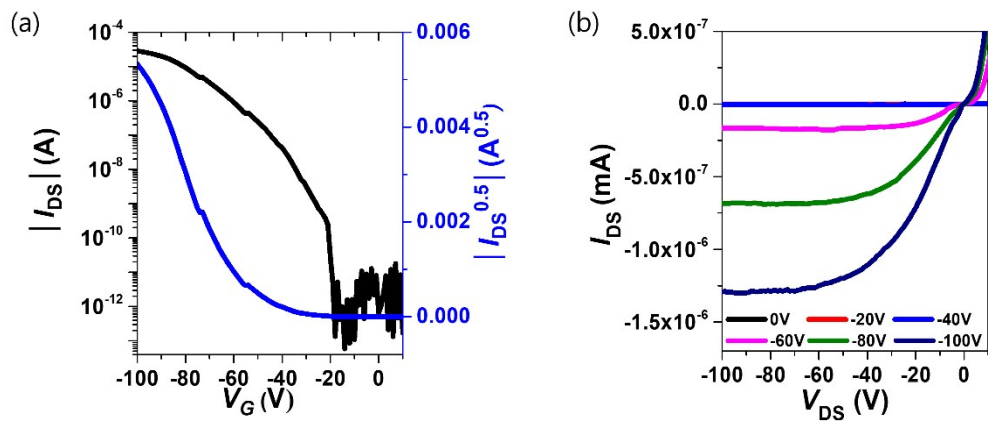

Fig. S10 The transfer and output curve for the spin-coated OFET of NTDP-F.

**Table S1.** The calculated vibronic energies ( $\omega_{\text{abs}}, E_{0-1}-E_{0-0}$  (eV)) of the NTDP derivatives in the vacuum-deposited thin-films.

|                 | $E_{0-1}$ (eV) | $E_{0-0}$ (eV) | $E_{0-1}-E_{0-0}$ (eV) |
|-----------------|----------------|----------------|------------------------|
| <b>NTDP-OMe</b> | 2.768          | 2.594          | 0.174                  |
| <b>NTDP-Me</b>  | 2.774          | 2.594          | 0.180                  |
| <b>NTDP</b>     | 2.713          | 2.536          | 0.177                  |
| <b>NTDP-F</b>   | 2.805          | 2.600          | 0.205                  |
| <b>NTDP-Cl</b>  | 2.761          | 2.583          | 0.178                  |

**Table S2.** Crystallographic data of the **NTDP-OMe** single crystal.

|                                   |                                             |                               |
|-----------------------------------|---------------------------------------------|-------------------------------|
| Identification code               | NTDP-OMe                                    |                               |
| Empirical formula                 | C38 H50 N2 O4                               |                               |
| Formula weight                    | 598.80                                      |                               |
| Temperature                       | 173(2) K                                    |                               |
| Wavelength                        | 0.71073 Å                                   |                               |
| Crystal system                    | Triclinic                                   |                               |
| Space group                       | P-1                                         |                               |
| Unit cell dimensions              | a = 9.8379(7) Å                             | $\alpha = 107.121(5)^\circ$ . |
|                                   | b = 13.0844(10) Å                           | $\beta = 99.386(5)^\circ$ .   |
|                                   | c = 15.0165(11) Å                           | $\gamma = 107.685(5)^\circ$ . |
| Volume                            | 1691.0(2) Å <sup>3</sup>                    |                               |
| Z                                 | 2                                           |                               |
| Density (calculated)              | 1.176 Mg/m <sup>3</sup>                     |                               |
| Absorption coefficient            | 0.075 mm <sup>-1</sup>                      |                               |
| F(000)                            | 648                                         |                               |
| Crystal size                      | 0.334 x 0.243 x 0.152 mm <sup>3</sup>       |                               |
| Theta range for data collection   | 1.477 to 28.431°.                           |                               |
| Index ranges                      | -13<=h<=13, -17<=k<=17, -19<=l<=20          |                               |
| Reflections collected             | 25703                                       |                               |
| Independent reflections           | 8352 [R(int) = 0.0701]                      |                               |
| Completeness to theta = 25.242°   | 100.0 %                                     |                               |
| Absorption correction             | Semi-empirical from equivalents             |                               |
| Max. and min. transmission        | 0.7457 and 0.5430                           |                               |
| Refinement method                 | Full-matrix least-squares on F <sup>2</sup> |                               |
| Data / restraints / parameters    | 8352 / 0 / 397                              |                               |
| Goodness-of-fit on F <sup>2</sup> | 0.992                                       |                               |
| Final R indices [I>2sigma(I)]     | R1 = 0.0747, wR2 = 0.2026                   |                               |
| R indices (all data)              | R1 = 0.1607, wR2 = 0.2575                   |                               |
| Extinction coefficient            | n/a                                         |                               |
| Largest diff. peak and hole       | 0.558 and -0.284 e.Å <sup>-3</sup>          |                               |

**Table S3.** Crystallographic data of the **NTDP-Me** single crystal.

|                                   |                                             |                               |
|-----------------------------------|---------------------------------------------|-------------------------------|
| Identification code               | Me                                          |                               |
| Empirical formula                 | C38 H50 N2 O2                               |                               |
| Formula weight                    | 566.80                                      |                               |
| Temperature                       | 223(2) K                                    |                               |
| Wavelength                        | 0.71073 Å                                   |                               |
| Crystal system                    | Triclinic                                   |                               |
| Space group                       | P-1                                         |                               |
| Unit cell dimensions              | a = 9.9421(5) Å                             | $\alpha = 107.482(3)^\circ$ . |
|                                   | b = 12.3885(6) Å                            | $\beta = 99.832(3)^\circ$ .   |
|                                   | c = 15.1226(7) Å                            | $\gamma = 104.852(3)^\circ$ . |
| Volume                            | 1654.05(14) Å <sup>3</sup>                  |                               |
| Z                                 | 2                                           |                               |
| Density (calculated)              | 1.138 Mg/m <sup>3</sup>                     |                               |
| Absorption coefficient            | 0.069 mm <sup>-1</sup>                      |                               |
| F(000)                            | 616                                         |                               |
| Crystal size                      | 0.513 x 0.322 x 0.021 mm <sup>3</sup>       |                               |
| Theta range for data collection   | 1.466 to 28.295°.                           |                               |
| Index ranges                      | -13<=h<=10, -16<=k<=16, -20<=l<=20          |                               |
| Reflections collected             | 31183                                       |                               |
| Independent reflections           | 8191 [R(int) = 0.0564]                      |                               |
| Completeness to theta = 25.242°   | 99.9 %                                      |                               |
| Absorption correction             | Semi-empirical from equivalents             |                               |
| Max. and min. transmission        | 0.7457 and 0.4930                           |                               |
| Refinement method                 | Full-matrix least-squares on F <sup>2</sup> |                               |
| Data / restraints / parameters    | 8191 / 0 / 380                              |                               |
| Goodness-of-fit on F <sup>2</sup> | 1.059                                       |                               |
| Final R indices [I>2sigma(I)]     | R1 = 0.0724, wR2 = 0.1980                   |                               |
| R indices (all data)              | R1 = 0.1234, wR2 = 0.2303                   |                               |
| Extinction coefficient            | 0.0050(15)                                  |                               |
| Largest diff. peak and hole       | 0.445 and -0.238 e.Å <sup>-3</sup>          |                               |

**Table S4.** Crystallographic data of the **NTDP** single crystal.

|                                   |                                                                                                               |
|-----------------------------------|---------------------------------------------------------------------------------------------------------------|
| Identification code               | NTDP                                                                                                          |
| Empirical formula                 | C <sub>36</sub> H <sub>46</sub> N <sub>2</sub> O <sub>2</sub>                                                 |
| Formula weight                    | 538.75                                                                                                        |
| Temperature                       | 173(2) K                                                                                                      |
| Wavelength                        | 0.71073 Å                                                                                                     |
| Crystal system                    | Monoclinic                                                                                                    |
| Space group                       | P2 <sub>1</sub> /c                                                                                            |
| Unit cell dimensions              | a = 17.7449(3) Å      α = 90°.<br>b = 5.12040(10) Å      β = 106.5180(10)°.<br>c = 17.2448(3) Å      γ = 90°. |
| Volume                            | 1502.21(5) Å <sup>3</sup>                                                                                     |
| Z                                 | 2                                                                                                             |
| Density (calculated)              | 1.191 Mg/m <sup>3</sup>                                                                                       |
| Absorption coefficient            | 0.073 mm <sup>-1</sup>                                                                                        |
| F(000)                            | 584                                                                                                           |
| Crystal size                      | 0.712 x 0.177 x 0.153 mm <sup>3</sup>                                                                         |
| Theta range for data collection   | 2.394 to 28.337°.                                                                                             |
| Index ranges                      | -23<=h<=23, -6<=k<=6, -22<=l<=22                                                                              |
| Reflections collected             | 25950                                                                                                         |
| Independent reflections           | 3728 [R(int) = 0.0291]                                                                                        |
| Completeness to theta = 25.242°   | 99.8 %                                                                                                        |
| Absorption correction             | Semi-empirical from equivalents                                                                               |
| Max. and min. transmission        | 0.7457 and 0.7019                                                                                             |
| Refinement method                 | Full-matrix least-squares on F <sup>2</sup>                                                                   |
| Data / restraints / parameters    | 3728 / 0 / 181                                                                                                |
| Goodness-of-fit on F <sup>2</sup> | 1.050                                                                                                         |
| Final R indices [I>2sigma(I)]     | R1 = 0.0435, wR2 = 0.1116                                                                                     |
| R indices (all data)              | R1 = 0.0519, wR2 = 0.1177                                                                                     |
| Extinction coefficient            | Multi-scan SADABS                                                                                             |
| Largest diff. peak and hole       | 0.350 and -0.212 e.Å <sup>-3</sup>                                                                            |

**Table S5.** Crystallographic data of the **NTDP-F** single crystal.

|                                   |                                                                              |                    |
|-----------------------------------|------------------------------------------------------------------------------|--------------------|
| Identification code               | ntdp-f                                                                       |                    |
| Empirical formula                 | C <sub>36</sub> H <sub>44</sub> F <sub>2</sub> N <sub>2</sub> O <sub>2</sub> |                    |
| Formula weight                    | 574.73                                                                       |                    |
| Temperature                       | 173(2) K                                                                     |                    |
| Wavelength                        | 0.71073 Å                                                                    |                    |
| Crystal system                    | Monoclinic                                                                   |                    |
| Space group                       | P2 <sub>1</sub> /c                                                           |                    |
| Unit cell dimensions              | a = 17.8570(4) Å                                                             | α = 90°.           |
|                                   | b = 5.13060(10) Å                                                            | β = 105.4039(14)°. |
|                                   | c = 17.2716(4) Å                                                             | γ = 90°.           |
| Volume                            | 1525.53(6) Å <sup>3</sup>                                                    |                    |
| Z                                 | 2                                                                            |                    |
| Density (calculated)              | 1.251 Mg/m <sup>3</sup>                                                      |                    |
| Absorption coefficient            | 0.085 mm <sup>-1</sup>                                                       |                    |
| F(000)                            | 616                                                                          |                    |
| Crystal size                      | 0.596 x 0.114 x 0.087 mm <sup>3</sup>                                        |                    |
| Theta range for data collection   | 2.366 to 28.279°.                                                            |                    |
| Index ranges                      | -23<=h<=23, -6<=k<=6, -19<=l<=22                                             |                    |
| Reflections collected             | 13597                                                                        |                    |
| Independent reflections           | 3712 [R(int) = 0.0711]                                                       |                    |
| Completeness to theta = 25.242°   | 99.6 %                                                                       |                    |
| Absorption correction             | (SADABS; Sheldrick, 2014)                                                    |                    |
| Max. and min. transmission        | 0.7457 and 0.5962                                                            |                    |
| Refinement method                 | Full-matrix least-squares on F <sup>2</sup>                                  |                    |
| Data / restraints / parameters    | 3712 / 0 / 190                                                               |                    |
| Goodness-of-fit on F <sup>2</sup> | 1.074                                                                        |                    |
| Final R indices [I>2sigma(I)]     | R1 = 0.0925, wR2 = 0.2545                                                    |                    |
| R indices (all data)              | R1 = 0.1224, wR2 = 0.2719                                                    |                    |
| Extinction coefficient            | n/a                                                                          |                    |
| Largest diff. peak and hole       | 0.404 and -0.435 e.Å <sup>-3</sup>                                           |                    |



**Table S6.** Crystallographic data of the **NTDP-Cl** single crystal.

|                                   |                                                                               |                    |
|-----------------------------------|-------------------------------------------------------------------------------|--------------------|
| Identification code               | NTDP-Cl                                                                       |                    |
| Empirical formula                 | C <sub>36</sub> H <sub>44</sub> Cl <sub>2</sub> N <sub>2</sub> O <sub>2</sub> |                    |
| Formula weight                    | 607.63                                                                        |                    |
| Temperature                       | 173(2) K                                                                      |                    |
| Wavelength                        | 0.71073 Å                                                                     |                    |
| Crystal system                    | Triclinic                                                                     |                    |
| Space group                       | P-1                                                                           |                    |
| Unit cell dimensions              | a = 9.58810(10) Å                                                             | α = 108.5410(10)°. |
|                                   | b = 12.12040(10) Å                                                            | β = 99.8950(10)°.  |
|                                   | c = 15.3508(2) Å                                                              | γ = 101.3960(10)°. |
| Volume                            | 1604.28(3) Å <sup>3</sup>                                                     |                    |
| Z                                 | 2                                                                             |                    |
| Density (calculated)              | 1.258 Mg/m <sup>3</sup>                                                       |                    |
| Absorption coefficient            | 0.237 mm <sup>-1</sup>                                                        |                    |
| F(000)                            | 648                                                                           |                    |
| Crystal size                      | 0.638 x 0.117 x 0.020 mm <sup>3</sup>                                         |                    |
| Theta range for data collection   | 1.446 to 27.488°.                                                             |                    |
| Index ranges                      | -12<=h<=12, -15<=k<=15, -19<=l<=19                                            |                    |
| Reflections collected             | 43280                                                                         |                    |
| Independent reflections           | 7346 [R(int) = 0.0386]                                                        |                    |
| Completeness to theta = 25.242°   | 100.0 %                                                                       |                    |
| Absorption correction             | Semi-empirical from equivalents                                               |                    |
| Max. and min. transmission        | 0.7456 and 0.6897                                                             |                    |
| Refinement method                 | Full-matrix least-squares on F <sup>2</sup>                                   |                    |
| Data / restraints / parameters    | 7346 / 0 / 379                                                                |                    |
| Goodness-of-fit on F <sup>2</sup> | 1.027                                                                         |                    |
| Final R indices [I>2sigma(I)]     | R1 = 0.0466, wR2 = 0.1193                                                     |                    |
| R indices (all data)              | R1 = 0.0613, wR2 = 0.1300                                                     |                    |
| Extinction coefficient            | Multi-scan SABADS                                                             |                    |
| Largest diff. peak and hole       | 0.589 and -0.318 e.Å <sup>-3</sup>                                            |                    |

**Table S7.** [hk] planes deduced from the reflection columns along the  $q_{xy}$ -direction in the vacuum deposited thin-film.

|                 | $q_{xy}$ ( $\text{\AA}^{-1}$ ) | hk    |
|-----------------|--------------------------------|-------|
| <b>NTDP-OMe</b> | 0.51                           | [01]  |
|                 | 0.67                           | [10]  |
|                 | 0.71                           | [1-1] |
|                 | 0.95                           | [11]  |
|                 | 1.01                           | [02]  |
|                 | 1.03                           | [1-2] |
|                 | 1.27                           | [2-1] |
|                 | 1.33                           | [20]  |
| <b>NTDP-Me</b>  | 0.52                           | [01]  |
|                 | 0.65                           | [10]  |
|                 | 0.72                           | [1-1] |
|                 | 0.94                           | [11]  |
|                 | 1.05                           | [02]  |
|                 | 1.07                           | [1-2] |
|                 | 1.26                           | [2-1] |
|                 | 1.30                           | [20]  |
| <b>NTDP</b>     | 0.73                           | [02]  |
|                 | 1.23                           | [10]  |
|                 | 1.28                           | [11]  |
|                 | 1.41                           | [12]  |
|                 | 1.45                           | [04]  |
|                 | 1.62                           | [13]  |
| <b>NTDP-F</b>   | 0.52                           | [01]  |
|                 | 0.97                           | [11]  |
|                 | 1.03                           | [02]  |
|                 | 1.32                           | [12]  |
|                 | 1.65                           | [20]  |
|                 | 1.72                           | [21]  |
|                 | 1.76                           | [13]  |
|                 | 1.95                           | [22]  |

]

**Table S8.** [hk] planes deduced from the reflection columns along the  $q_{xy}$ -direction of the **NTDP-F** spin-coated film. The extracted lattice parameters were  $b = 7.67 \text{ \AA}$ ,  $c = 12.35 \text{ \AA}$ , and  $\alpha = 90.2^\circ$ .

| $q_{xy} (\text{\AA}^{-1})$ | hk   |
|----------------------------|------|
| 0.51                       | [01] |
| 0.97                       | [11] |
| 1.02                       | [02] |
| 1.30                       | [12] |
| 1.53                       | [03] |
| 1.64                       | [20] |
| 1.70                       | [21] |
| 1.71                       | [13] |
| 1.94                       | [22] |

**NTDP-OMe**

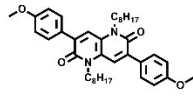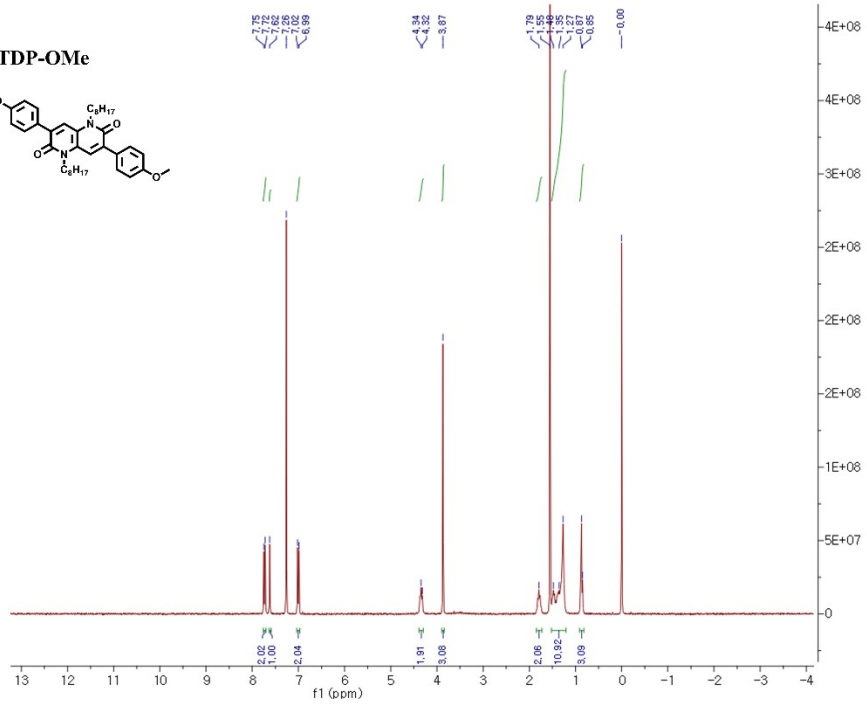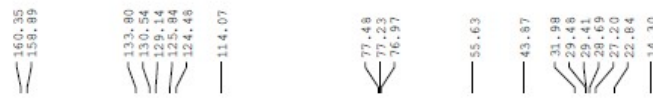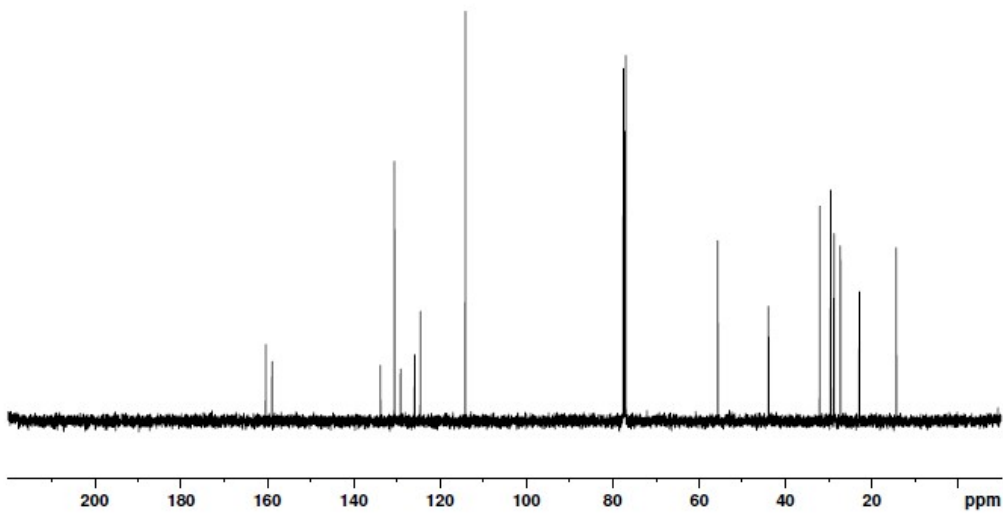

<sup>1</sup>H-NMR and <sup>13</sup>C-NMR Spectra of NTDP-OMe.

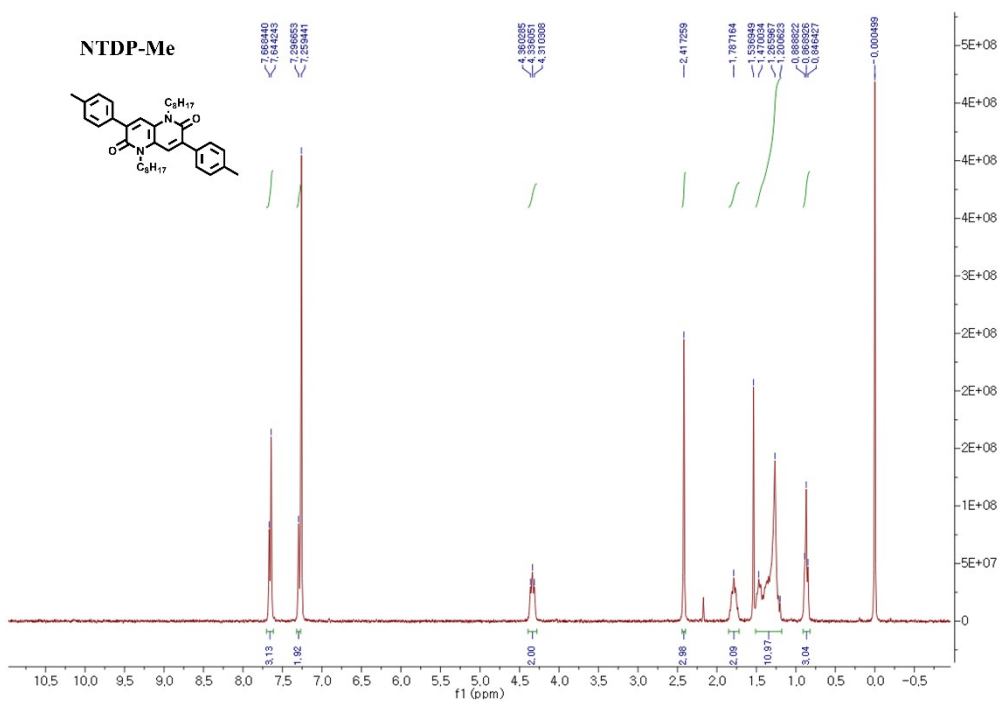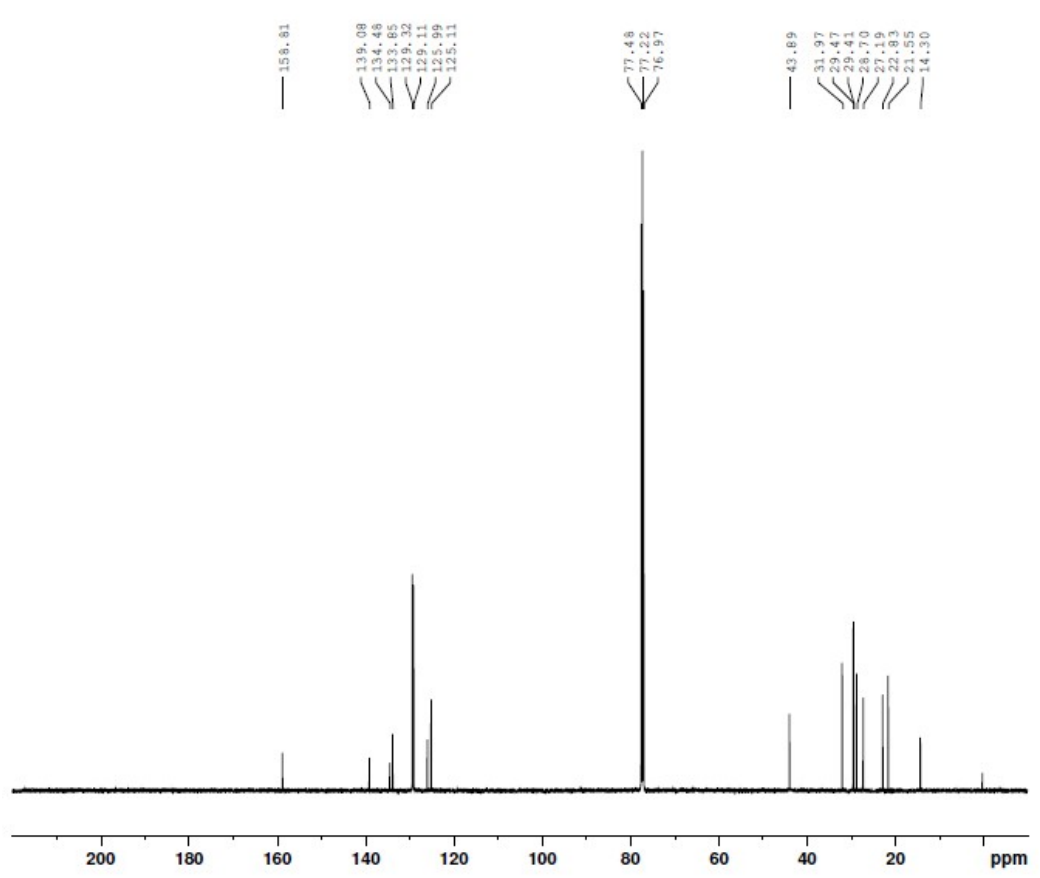

<sup>1</sup>H-NMR and <sup>13</sup>C-NMR Spectra of NTDP-Me.

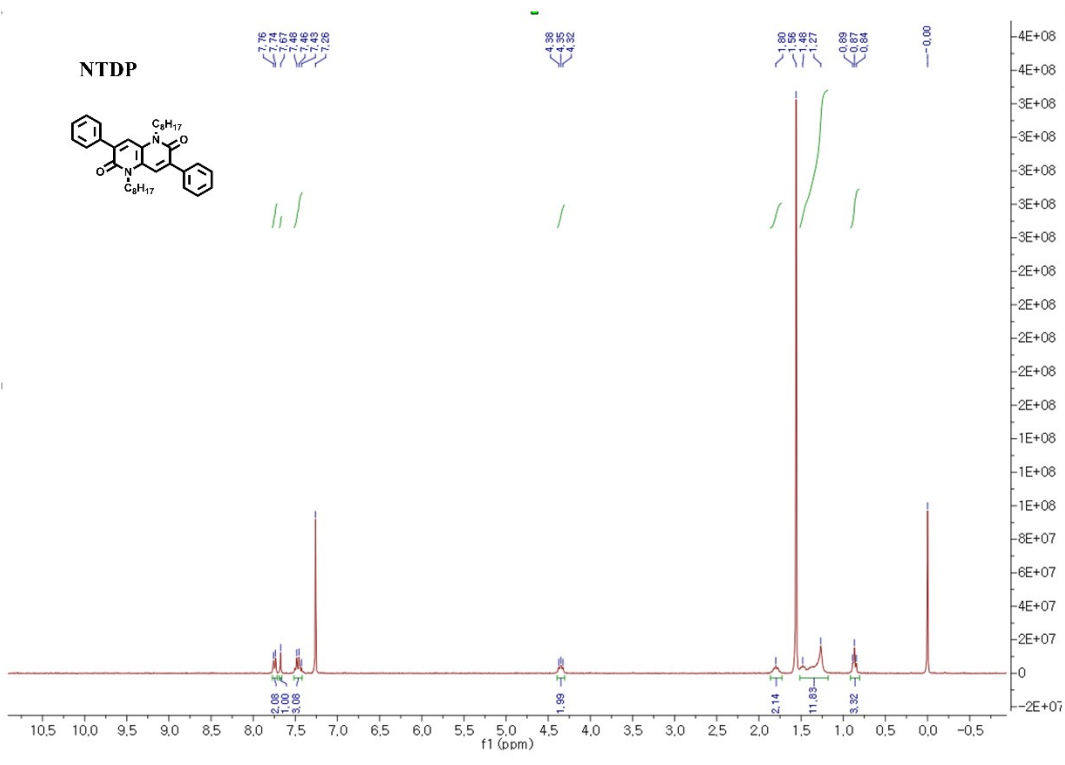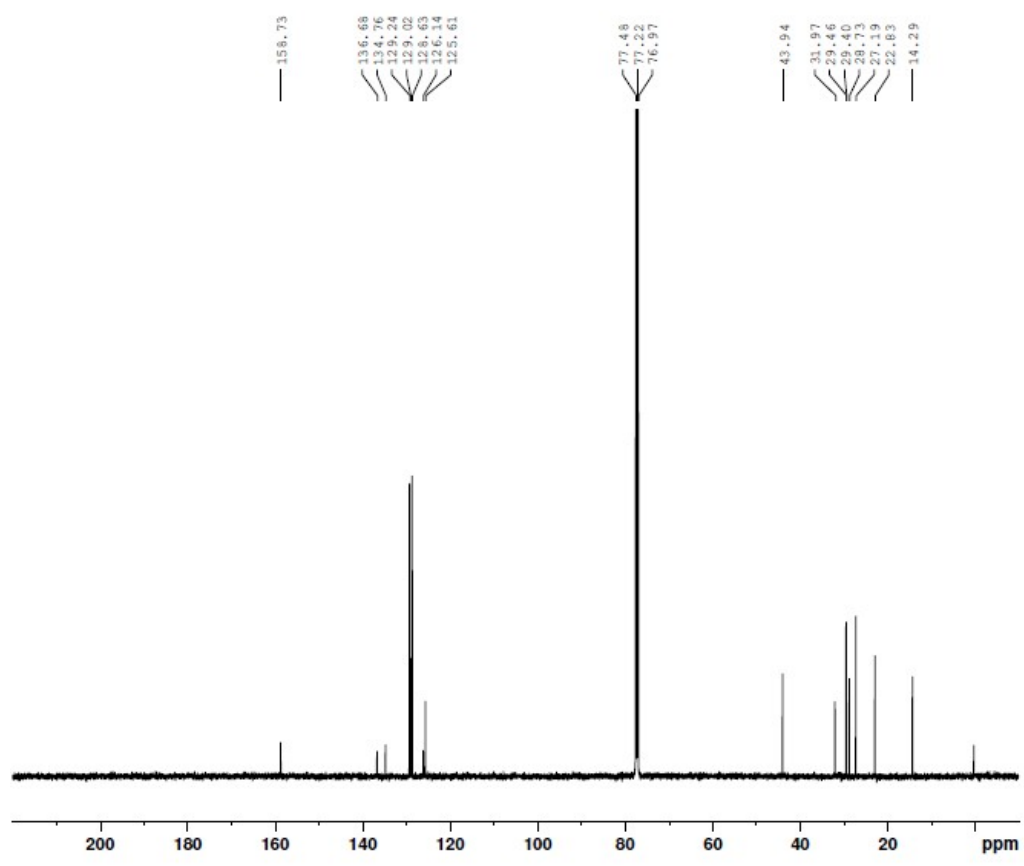

<sup>1</sup>H-NMR and <sup>13</sup>C-NMR Spectra of NTDP.

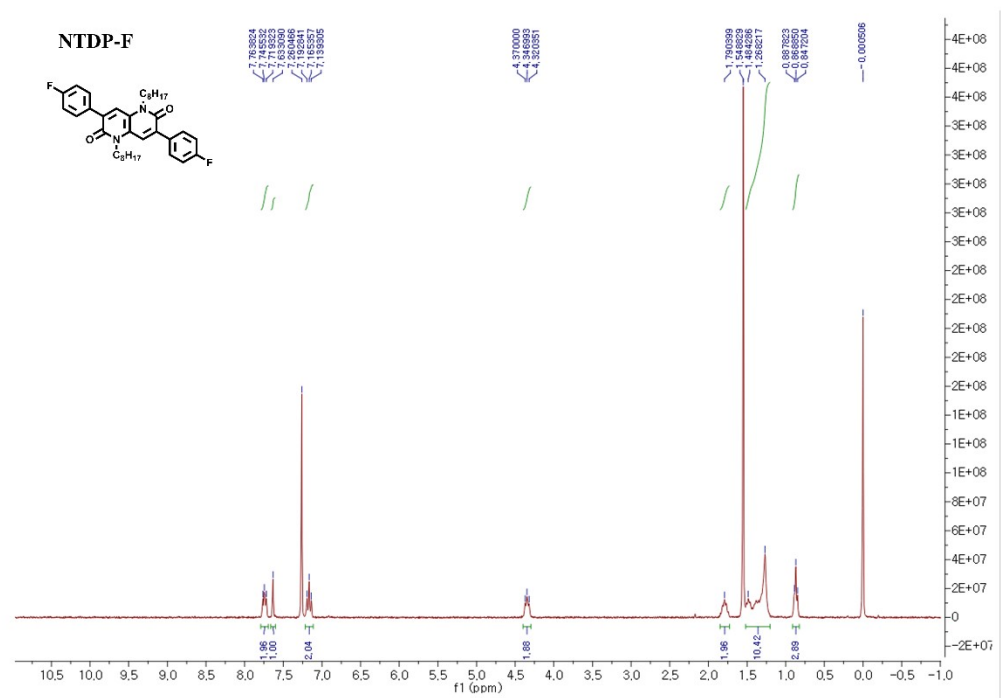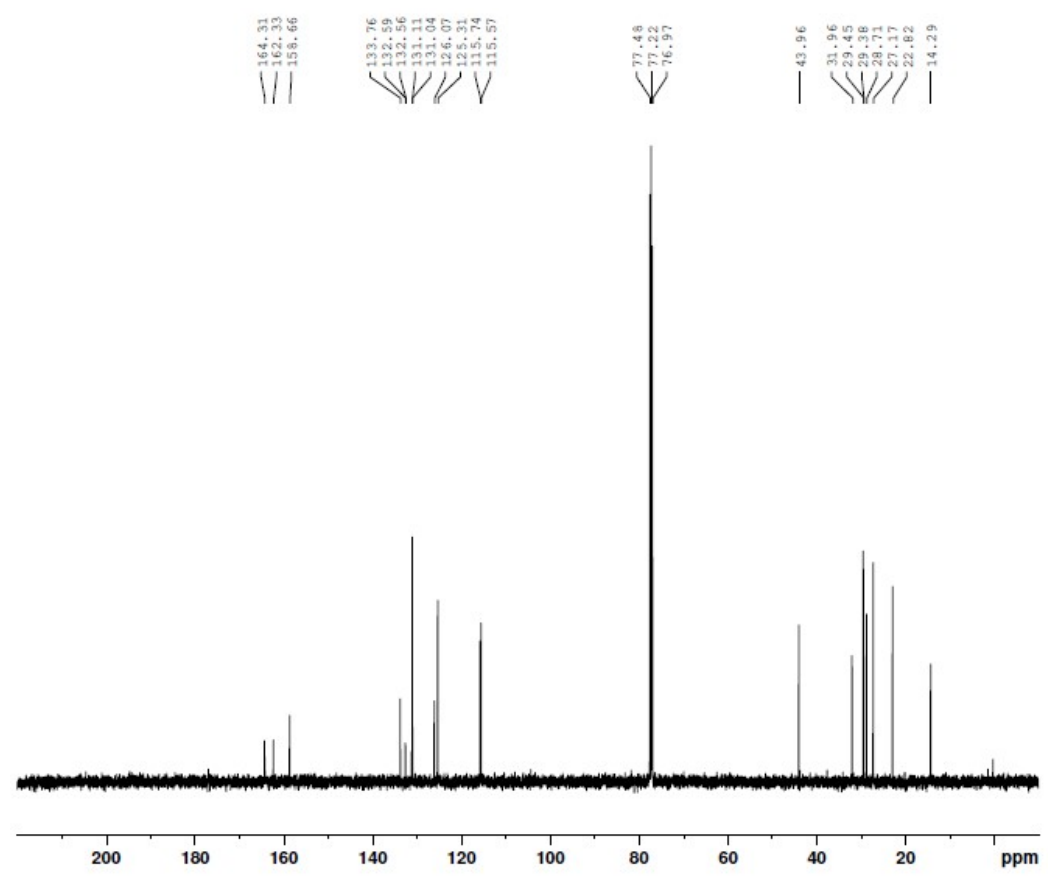

<sup>1</sup>H-NMR and <sup>13</sup>C-NMR Spectra of NTDP-F.

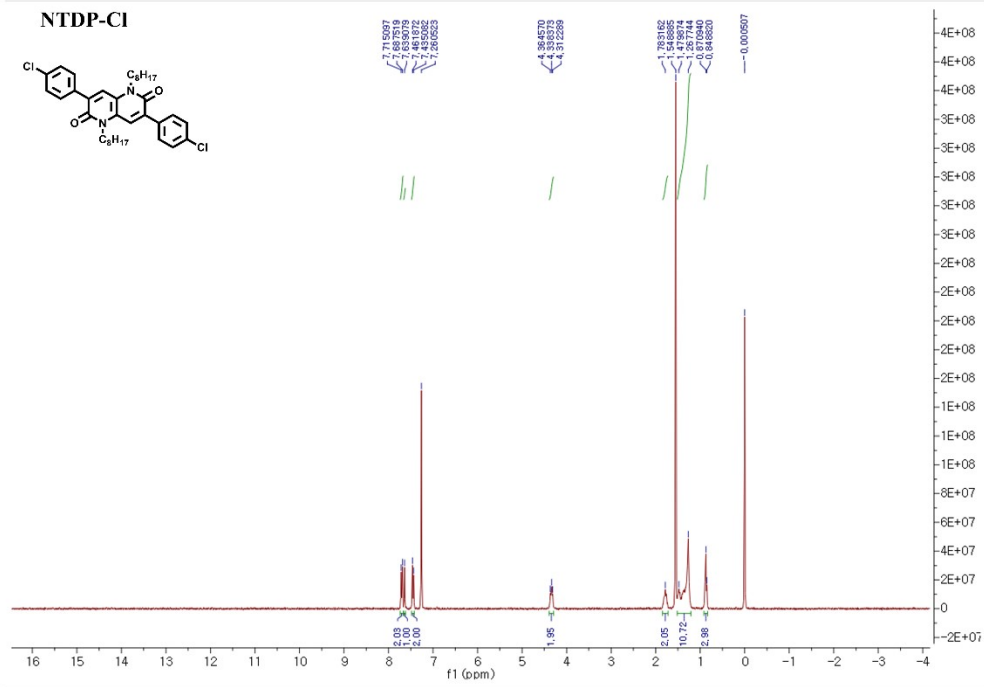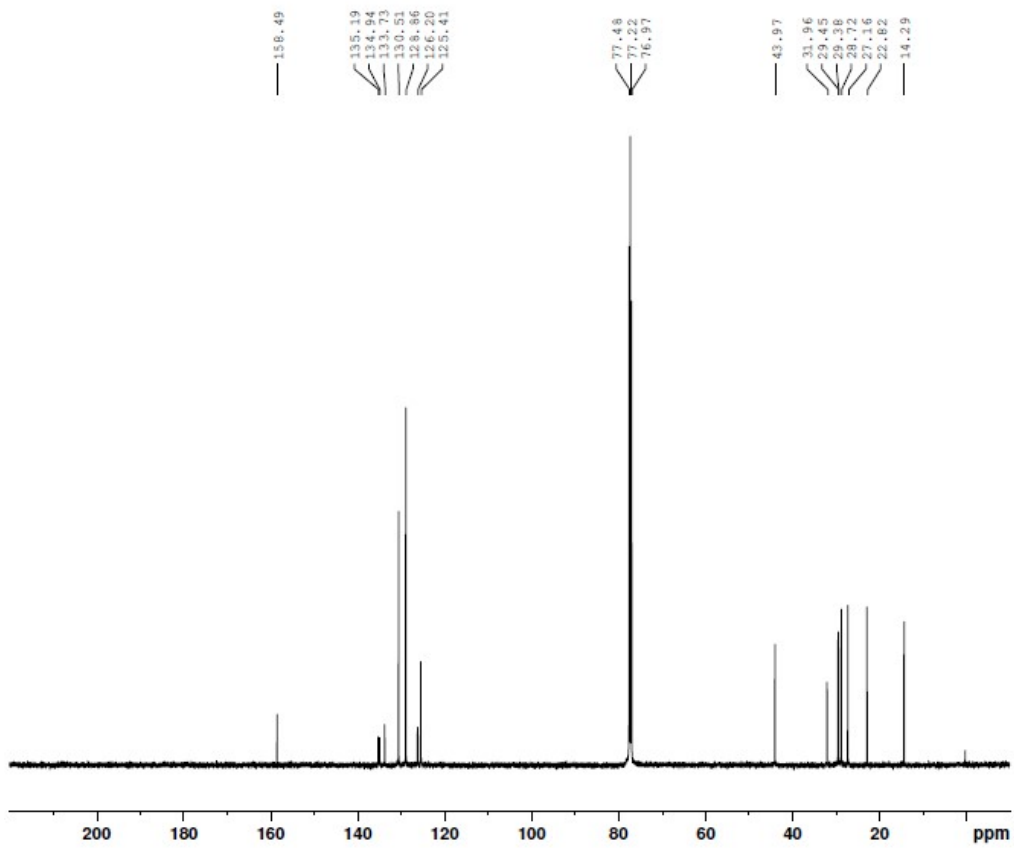

<sup>1</sup>H-NMR and <sup>13</sup>C-NMR Spectra of NTDP-Cl
